# Supplementary material for: Secondary phenotype analysis in ascertained family designs: application to the Leiden longevity study
Source: PubMed Central journal article supplement — Stat Med. 2017 Mar 16;36(14):2288–301. doi: 10.1002/sim.7281 (PMC5485037; doi:10.1002/sim.7281), 2017-03-16
Supplement: SIM-36-2288-s001.pdf [file SIM-36-2288-s001.pdf]

Supplementary Information for:  
Secondary phenotype analysis in ascertained family designs: Application  
to the Leiden Longevity Study

Renaud TISSIER<sup>a</sup>, Roula TSONAKA<sup>a</sup>, Simon P. MOOIJAART<sup>b</sup>, Eline SLAGBOOM<sup>c</sup>,  
Jeanine J. HOUWING-DUISTERMAAT<sup>a,d</sup>

In this supplementary materials, we are presenting all the simulations results obtained to compare our retrospective likelihood approach to the naive mixed model approach in Section A. In section B are presented the association results between 41 selected SNPs and triglyceride levels obtained on the Leiden Longevity Study.

## Contents

|                                                                                                                                                            |           |
|------------------------------------------------------------------------------------------------------------------------------------------------------------|-----------|
| <b>A Simulation results</b>                                                                                                                                | <b>2</b>  |
| A.1 Description of the simulation study . . . . .                                                                                                          | 2         |
| A.2 Simulation study results for a SNP as genetic marker . . . . .                                                                                         | 2         |
| A.2.1 Empirical bias and efficiency of association parameters for the secondary phenotype<br>under genetic association with the primary phenotype. . . . . | 2         |
| A.2.2 Robustness of the retrospective likelihood methods to violation of the probit model<br>assumption for the primary phenotype . . . . .                | 8         |
| A.3 Simulation study for a polygenic score . . . . .                                                                                                       | 13        |
| <b>B Results analysis Leiden Longevity Study on triglyceride levels</b>                                                                                    | <b>17</b> |

## A Simulation results

### A.1 Description of the simulation study

A simulation study has been set up to evaluate the performance of our proposed method in various settings for the correlation between the two outcomes, the disease prevalence, the strength of the association between the SNP and the primary phenotype and strength of the ascertainment mechanism. In addition, we contrasted our method with the naive approach which is typically followed in practice, namely analysis of the secondary trait without correcting for the sampling mechanism. In particular in this case we applied the standard linear mixed effects model for the secondary phenotype and explicitly modelled the familial relationship. The two methods have been compared in terms of Root Mean Square Error (RMSE), and 95% coverage probabilities. We simulate multiple cases family data and secondary phenotypes for sibships using the mixed-effects logistic regression:

$$\begin{aligned} Y_i^* &= \alpha_0 + \alpha_1 G_i + \sigma_{G_Y} b_i^Y + \sigma_u u_i + \epsilon_{Y_i} \\ X_i &= \beta_0 + \beta_1 G_i + \sigma_{G_X} b_i^X + \sigma_u u_i + \sigma_\epsilon \epsilon_{X_i} \end{aligned} \tag{1}$$

With respect to the familial relationships we have simulated families with only siblings such that our simulation resembles more the LLS design. For the prevalence of the primary phenotype we considered two cases: the disease prevalence equals 1% which corresponds to  $\alpha_0 \approx -2.32$  and 5% which corresponds to  $\alpha_0 \approx -1.64$ . The SNP effect on the primary phenotype measured by  $\alpha_1$ , was taken equal to 0.1, 0.5 or 1. In addition the remaining variance parameters have been chosen such that they correspond to 50% heritability, i.e.  $\sigma_{G_X}=2$ ,  $\sigma_{G_Y} = \sqrt{3}$ ,  $\sigma_u = \sqrt{2}$  and  $\sigma_\epsilon = \sqrt{2}$ . which corresponds to 0.78 correlation between the primary and the secondary phenotypes. Finally for the secondary phenotype we choose as fixed effects values  $\beta_0 = 3.5$  and  $\beta_1 = 0.2$  or 2. Finally for each of the 4 scenarios (rare or low disease and low and higher SNP effect on the primary phenotype) we considered 4 ascertainment mechanisms, i.e. we assumed that families have been sampled provided that at least 1 or 2 out of the 5 members are affected. For each dataset 400 families were simulated.

### A.2 Simulation study results for a SNP as genetic marker

#### A.2.1 Empirical bias and efficiency of association parameters for the secondary phenotype under genetic association with the primary phenotype.

Table S1: Simulations results obtained on 500 datasets with 400 families of size 5 with at least 2 cases of a rare disease (prevalence around 1%) and  $\alpha_1=0.1$ . Into brackets are respectively standard deviations, root mean square errors and the coverage probabilities.

|                   | Real Value | Retrospective likelihood |         |          | Naive method |         |          |
|-------------------|------------|--------------------------|---------|----------|--------------|---------|----------|
|                   |            | Est (SD)                 | (RMSE)  | (Cov Pr) | Est (SD)     | (RMSE)  | (Cov Pr) |
| $\beta_0$         | 3.500      | 3.612(1.444)             | (1.533) | (0.859)  | 5.192(0.178) | (1.702) | (0.000)  |
| $\beta_1$         | 0.200      | 0.211(0.204)             | (0.212) | (0.936)  | 0.195(0.215) | (218)   | (0.934)  |
| $\sigma_{GX}$     | 2.000      | 1.841(0.479)             | (0.795) | (0.622)  | 0.913(0.583) | (1.131) | (0.128)  |
| $\sigma_\epsilon$ | 1.414      | 1.552(0.145)             | (0.271) | (0.662)  | 2.471(0.049) | (1.063) | (0.000)  |
| $\alpha_0$        | -2.326     | -2.279(1.650)            | (2.112) | (0.773)  | -            |         |          |
| $\alpha_1$        | 0.100      | 0.087(0.176)             | (0.196) | (0.906)  | -            |         |          |
| $\sigma_{GY}$     | 1.732      | 1.317(0.677)             | (0.965) | (0.844)  | -            |         |          |
| $\sigma_u$        | 1.414      | 0.995(0.687)             | (0.778) | (0.730)  | -            |         |          |

Table S2: Simulations results obtained on 500 datasets with 400 families of size 5 with at least 2 cases of a rare disease (prevalence around 1%) and  $\alpha_1=0.5$ . Into brackets are respectively standard deviations, root mean square errors and the coverage probabilities.

|                   | Real Value | Retrospective likelihood |         |          | Naive method |         |          |
|-------------------|------------|--------------------------|---------|----------|--------------|---------|----------|
|                   |            | Est (SD)                 | (RMSE)  | (Cov Pr) | Est (SD)     | (RMSE)  | (Cov Pr) |
| $\beta_0$         | 3.500      | 3.678(1.140)             | (1.172) | (0.932)  | 5.099(0.185) | (1.610) | (0.000)  |
| $\beta_1$         | 0.200      | 0.191(0.212)             | (0.228) | (0.906)  | 0.108(0.198) | (0.234) | (0.893)  |
| $\sigma_{GX}$     | 2.000      | 1.899(0.561)             | (0.693) | (0.728)  | 0.974(0.458) | (1.068) | (0.106)  |
| $\sigma_\epsilon$ | 1.414      | 1.529(0.123)             | (0.231) | (0.707)  | 2.444(0.051) | (1.038) | (0.000)  |
| $\alpha_0$        | -2.326     | -1.989(1.449)            | (1.814) | (0.793)  | -            |         |          |
| $\alpha_1$        | 0.500      | 0.416(0.173)             | (0.262) | (0.905)  | -            |         |          |
| $\sigma_{GY}$     | 1.732      | 1.461(0.673)             | (1.044) | (0.876)  | -            |         |          |
| $\sigma_u$        | 1.414      | 1.072(0.671)             | (0.730) | (0.813)  | -            |         |          |

Table S3: Simulations results obtained on 500 datasets with 400 families of size 5 with at least 1 case of a rare disease (prevalence around 1%) and  $\alpha_1=0.1$ . Into brackets are respectively standard deviations, root mean square errors and the coverage probabilities.

|                   | Real Value | Retrospective likelihood |         |          | Naive method |         |          |
|-------------------|------------|--------------------------|---------|----------|--------------|---------|----------|
|                   |            | Est (SD)                 | (RMSE)  | (Cov Pr) | Est (SD)     | (RMSE)  | (Cov Pr) |
| $\beta_0$         | 3.500      | 3.439(1.190)             | (1.216) | (0.912)  | 4.361(0.194) | (0.883) | (0.002)  |
| $\beta_1$         | 0.200      | 0.200(0.209)             | (0.213) | (0.955)  | 0.192(0.214) | (0.216) | (0.950)  |
| $\sigma_{GX}$     | 2.000      | 1.983(0.257)             | (0.278) | (0.679)  | 1.363(0.195) | (0.683) | (0.054)  |
| $\sigma_\epsilon$ | 1.414      | 1.552(0.119)             | (0.234) | (0.644)  | 2.356(0.058) | (0.951) | (0.000)  |
| $\alpha_0$        | -2.326     | -2.470(1.951)            | (2.169) | (0.902)  | -            |         |          |
| $\alpha_1$        | 0.100      | 0.074(0.174)             | (0.191) | (0.932)  | -            |         |          |
| $\sigma_{GY}$     | 1.732      | 1.553(0.574)             | (0.973) | (0.765)  | -            |         |          |
| $\sigma_u$        | 1.414      | 0.973(0.677)             | (0.745) | (0.862)  | -            |         |          |

Table S4: Simulations results obtained on 500 datasets with 400 families of size 5 with at least 1 case of a rare disease (prevalence around 1%) and  $\alpha_1=0.5$ . Into brackets are respectively standard deviations, root mean square errors and the coverage probabilities.

|                   | Real Value | Retrospective likelihood |         |          | Naive method |         |          |
|-------------------|------------|--------------------------|---------|----------|--------------|---------|----------|
|                   |            | Est (SD)                 | (RMSE)  | (Cov Pr) | Est (SD)     | (RMSE)  | (Cov Pr) |
| $\beta_0$         | 3.500      | 3.377(0.940)             | (0.927) | (0.949)  | 4.293(0.199) | (0.816) | (0.008)  |
| $\beta_1$         | 0.200      | 0.195(0.218)             | (0.218) | (0.943)  | 0.155(0.202) | (0.218) | (0.920)  |
| $\sigma_{GX}$     | 2.000      | 1.995(0.233)             | (0.233) | (0.704)  | 1.409(0.188) | (0.641) | (0.092)  |
| $\sigma_\epsilon$ | 1.414      | 1.544(0.115)             | (0.213) | (0.674)  | 2.329(0.059) | (0.924) | (0.000)  |
| $\alpha_0$        | -2.326     | -2.342(1.530)            | (1.536) | (0.961)  | -            |         |          |
| $\alpha_1$        | 0.500      | 0.412(0.156)             | (0.283) | (0.877)  | -            |         |          |
| $\sigma_{GY}$     | 1.732      | 1.578(0.556)             | (0.983) | (0.787)  | -            |         |          |
| $\sigma_u$        | 1.414      | 1.027(0.597)             | (0.698) | (0.888)  | -            |         |          |

Table S5: Simulations results obtained on 500 datasets with 400 families of size 5 with at least 2 cases of a common disease (prevalence around 5%) and  $\alpha_1=0.1$ . Into brackets are respectively standard deviations, root mean square errors and the coverage probabilities.

|                   | Real Value | Retrospective likelihood |         |          | Naive method |         |          |
|-------------------|------------|--------------------------|---------|----------|--------------|---------|----------|
|                   |            | Est (SD)                 | (RMSE)  | (Cov Pr) | Est (SD)     | (RMSE)  | (Cov Pr) |
| $\beta_0$         | 3.500      | 3.397(1.463)             | (1.530) | (0.901)  | 4.835(0.180) | (1.356) | (0.000)  |
| $\beta_1$         | 0.200      | 0.202(0.204)             | (0.205) | (0.939)  | 0.188(0.203) | (0.207) | (0.940)  |
| $\sigma_{GX}$     | 2.000      | 1.919(0.467)             | (0.653) | (0.650)  | 1.053(0.362) | (0.990) | (0.060)  |
| $\sigma_\epsilon$ | 1.414      | 1.543(0.131)             | (0.238) | (0.699)  | 2.404(0.052) | (0.998) | (0.000)  |
| $\alpha_0$        | -1.644     | -1.755(1.801)            | (2.091) | (0.874)  | -            |         |          |
| $\alpha_1$        | 0.100      | 0.075(0.169)             | (0.222) | (0.902)  | -            |         |          |
| $\sigma_{GY}$     | 1.732      | 1.470(0.669)             | (1.035) | (0.837)  | -            |         |          |
| $\sigma_u$        | 1.414      | 0.991(0.730)             | (0.765) | (0.798)  | -            |         |          |

Table S6: Simulations results obtained on 500 datasets with 400 families of size 5 with at least 2 cases of a common disease (prevalence around 5%) and  $\alpha_1=0.5$ . Into brackets are respectively standard deviations, root mean square errors and the coverage probabilities.

|                   | Real Value | Retrospective likelihood |         |          | Naive method |           |          |
|-------------------|------------|--------------------------|---------|----------|--------------|-----------|----------|
|                   |            | Est (SD)                 | (RMSE)  | (Cov Pr) | Est (SD)     | (RMSE)    | (Cov Pr) |
| $\beta_0$         | 3.500      | 3.393(1.179)             | (1.156) | (0.952)  | 4.753(0.187) | (0.1.266) | (0.000)  |
| $\beta_1$         | 0.200      | 0.197(0.212)             | (0.215) | (0.946)  | 0.103(0.201) | (0.221)   | (0.930)  |
| $\sigma_{GX}$     | 2.000      | 2.003(0.327)             | (0.513) | (0.700)  | 1.131(0.299) | (0.912)   | (0.032)  |
| $\sigma_\epsilon$ | 1.414      | 1.523(0.114)             | (0.193) | (0.702)  | 2.376(0.053) | (0.970)   | (0.000)  |
| $\alpha_0$        | -1.644     | -1.623(1.432)            | (1.663) | (0.952)  | -            |           |          |
| $\alpha_1$        | 0.500      | 0.409(0.170)             | (0.276) | (0.926)  | -            |           |          |
| $\sigma_{GY}$     | 1.732      | 1.530(0.570)             | (0.967) | (0.864)  | -            |           |          |
| $\sigma_u$        | 1.414      | 1.033(0.725)             | (0.763) | (0.878)  | -            |           |          |

Table S7: Simulations results obtained on 500 datasets with 400 families of size 5 with at least 1 case of a common disease (prevalence around 5%) and  $\alpha_1=0.1$ . Into brackets are respectively standard deviations, root mean square errors and the coverage probabilities.

|                   | Real Value | Retrospective likelihood |         |          | Naive method |         |          |
|-------------------|------------|--------------------------|---------|----------|--------------|---------|----------|
|                   |            | Est (SD)                 | (RMSE)  | (Cov Pr) | Est (SD)     | (RMSE)  | (Cov Pr) |
| $\beta_0$         | 3.500      | 3.285(1.203)             | (1.288) | (0.904)  | 4.124(0.198) | (0.653) | (0.110)  |
| $\beta_1$         | 0.200      | 0.203(0.209)             | (0.209) | (0.946)  | 0.191(0.205) | (0.217) | (0.940)  |
| $\sigma_{GX}$     | 2.000      | 1.999(0.237)             | (0.479) | (0.660)  | 1.471(0.172) | (0.586) | (0.134)  |
| $\sigma_\epsilon$ | 1.414      | 1.559(0.116)             | (0.221) | (0.672)  | 2.291(0.061) | (0.887) | (0.000)  |
| $\alpha_0$        | -1.644     | -1.991(1.870)            | (2.450) | (0.920)  | -            |         |          |
| $\alpha_1$        | 0.100      | 0.085(0.173)             | (0.221) | (0.916)  | -            |         |          |
| $\sigma_{GY}$     | 1.732      | 1.623(0.573)             | (1.033) | (0.742)  | -            |         |          |
| $\sigma_u$        | 1.414      | 0.960(0.738)             | (0.761) | (0.894)  | -            |         |          |

Table S8: Simulations results obtained on 500 datasets with 400 families of size 5 with at least 1 case of a common disease (prevalence around 5%) and  $\alpha_1=0.5$ . Into brackets are respectively standard deviations, root mean square errors and the coverage probabilities.

|                   | Real Value | Retrospective likelihood |         |          | Naive method |         |          |
|-------------------|------------|--------------------------|---------|----------|--------------|---------|----------|
|                   |            | Est (SD)                 | (RMSE)  | (Cov Pr) | Est (SD)     | (RMSE)  | (Cov Pr) |
| $\beta_0$         | 3.500      | 3.156(0.939)             | (0.973) | (0.946)  | 4.066(0.201) | (0.599) | (0.200)  |
| $\beta_1$         | 0.200      | 0.194(0.222)             | (0.226) | (0.944)  | 0.158(0.204) | (0.234) | (0.920)  |
| $\sigma_{GX}$     | 2.000      | 2.035(0.245)             | (0.254) | (0.712)  | 1.520(0.163) | (0.540) | (0.176)  |
| $\sigma_\epsilon$ | 1.414      | 1.543(0.124)             | (0.219) | (0.654)  | 2.263(0.063) | (0.861) | (0.000)  |
| $\alpha_0$        | -1.644     | -1.982(1.518)            | (1.612) | (0.960)  | -            |         |          |
| $\alpha_1$        | 0.500      | 0.430(0.304)             | (0.574) | (0.898)  | -            |         |          |
| $\sigma_{GY}$     | 1.732      | 1.680(0.574)             | (1.090) | (0.772)  | -            |         |          |
| $\sigma_u$        | 1.414      | 0.986(0.666)             | (0.718) | (0.894)  | -            |         |          |

Table S9: Estimates with standard deviations and RMSE of the heritability of the secondary phenotype are given for a common disease (prevalence  $\approx 5\%$ ), for the four ascertainment mechanisms and two values of  $\alpha_1$ .

| Ascertainment       | $\alpha_1$ | Retrospective likelihood | Naive method     |
|---------------------|------------|--------------------------|------------------|
| 1. At least 2 cases |            |                          |                  |
|                     | 0.10       | 0.49(0.08)(0.21)         | 0.17(0.08)(0.34) |
|                     | 0.50       | 0.50(0.08)(0.18)         | 0.19(0.08)(0.32) |
| 2. At least 1 case  |            |                          |                  |
|                     | 0.10       | 0.50(0.08)(0.17)         | 0.29(0.08)(0.22) |
|                     | 0.50       | 0.52(0.08)(0.16)         | 0.31(0.08)(0.20) |

Table S10: Estimates with standard deviations and RMSE of the heritability of the secondary phenotype are given for a rare disease (prevalence  $\approx 1\%$ ), for the four ascertainment mechanisms and two values of  $\alpha_1$ .

| Ascertainment       | $\alpha_1$ | Retrospective likelihood | Naive method     |
|---------------------|------------|--------------------------|------------------|
| 1. At least 2 cases |            |                          |                  |
|                     | 0.10       | 0.48(0.07)(0.22)         | 0.13(0.07)(0.37) |
|                     | 0.50       | 0.48(0.07)(0.22)         | 0.14(0.07)(0.36) |
| 2. At least 1 case  |            |                          |                  |
|                     | 0.10       | 0.50(0.08)(0.17)         | 0.25(0.08)(0.25) |
|                     | 0.50       | 0.50(0.08)(0.17)         | 0.27(0.08)(0.24) |

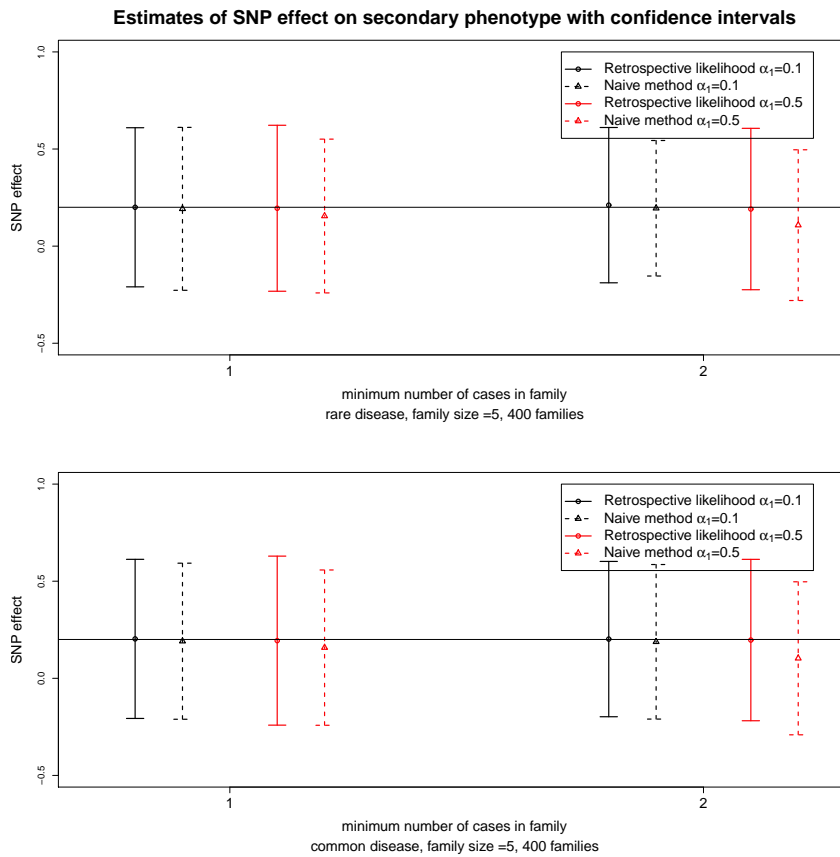

Figure S1: Estimates and 95% confidence intervals for the SNP effect on the secondary phenotype for the retrospective likelihood approach and the naive method. Results are obtained from 500 simulated datasets of 100 families for 2 ascertainment schedules. The top and bottom panel correspond to a rare or common primary phenotype with a prevalence around 1% and 5% respectively. In black and red are represented results for small ( $\alpha_1=0.5$ ) and large ( $\alpha_1=1$ ) effect sizes of the SNP on the primary phenotype respectively. The horizontal line corresponds to the true SNP effect on the secondary phenotype.

## A.2.2 Robustness of the retrospective likelihood methods to violation of the probit model assumption for the primary phenotype

Table S11: Simulations results obtained on 500 datasets with 400 families of size 5 with at least 2 cases of a rare disease (prevalence around 1%) and  $\alpha_1=0.1$ . Into brackets are respectively standard deviations, root mean square errors and the coverage probabilities.

|                   | Real Value | Retrospective likelihood<br>Est (SD) (RMSE) (Cov Pr) |
|-------------------|------------|------------------------------------------------------|
| $\beta_0$         | 3.500      | 3.586(0.897)(0.910)(0.905)                           |
| $\beta_1$         | 0.200      | 0.199(0.103)(0.104)(0.948)                           |
| $\sigma_{GX}$     | 2.000      | 1.887(0.155)(0.296)(0.623)                           |
| $\sigma_\epsilon$ | 1.414      | 1.571(0.050)(0.178)(0.257)                           |
| $\alpha_0$        | -2.326     | -1.366(0.838)(1.342)(0.659)                          |
| $\alpha_1$        | 0.100      | 0.053(0.094)(0.250)(0.901)                           |
| $\sigma_{GY}$     | 1.732      | 1.019(0.250)(0.764)(0.129)                           |
| $\sigma_u$        | 1.414      | 0.988(0.644)(0.526)(0.948)                           |

Table S12: Simulations results obtained on 500 datasets with 400 families of size 5 with at least 2 cases of a rare disease (prevalence around 1%) and  $\alpha_1=0.5$ . Into brackets are respectively standard deviations, root mean square errors and the coverage probabilities.

|                   | Real Value | Retrospective likelihood<br>Est (SD) (RMSE) (Cov Pr) |
|-------------------|------------|------------------------------------------------------|
| $\beta_0$         | 3.500      | 3.720(0.583)(0.625)(0.905)                           |
| $\beta_1$         | 0.200      | 0.197(0.106)(0.110)(0.945)                           |
| $\sigma_{GX}$     | 2.000      | 1.909(0.139)(0.271)(0.625)                           |
| $\sigma_\epsilon$ | 1.414      | 1.560(0.047)(0.162)(0.245)                           |
| $\alpha_0$        | -2.326     | -1.161(0.528)(1.245)(0.311)                          |
| $\alpha_1$        | 0.500      | 0.287(0.221)(0.232)(0.913)                           |
| $\sigma_{GY}$     | 1.732      | 1.052(0.221)(0.715)(0.094)                           |
| $\sigma_u$        | 1.414      | 1.009(0.501)(0.601)(0.975)                           |



Table S13: Simulations results obtained on 500 datasets with 400 families of size 5 with at least 1 case of a rare disease (prevalence around 1%) and  $\alpha_1=0.1$ . Into brackets are respectively standard deviations, root mean square errors and the coverage probabilities.

|                   | Real Value | Retrospective likelihood<br>Est (SD) (RMSE) (Cov Pr) |
|-------------------|------------|------------------------------------------------------|
| $\beta_0$         | 3.500      | 3.630(0.726)(0.730)(0.909)                           |
| $\beta_1$         | 0.200      | 0.200(0.104)(0.107)(0.961)                           |
| $\sigma_{GX}$     | 2.000      | 1.887(0.133)(0.266)(0.623)                           |
| $\sigma_\epsilon$ | 1.414      | 1.572(0.050)(0.176)(0.248)                           |
| $\alpha_0$        | -2.326     | -1.377(0.784)(1.339)(0.657)                          |
| $\alpha_1$        | 0.100      | 0.056(0.090)(0.231)(0.900)                           |
| $\sigma_{GY}$     | 1.732      | 1.010(0.231)(0.771)(0.116)                           |
| $\sigma_u$        | 1.414      | 0.998(0.495)(0.514)(0.761)                           |

Table S14: Simulations results obtained on 500 datasets with 400 families of size 5 with at least 1 case of a rare disease (prevalence around 1%) and  $\alpha_1=0.5$ . Into brackets are respectively standard deviations, root mean square errors and the coverage probabilities.

|                   | Real Value | Retrospective likelihood<br>Est (SD) (RMSE) (Cov Pr) |
|-------------------|------------|------------------------------------------------------|
| $\beta_0$         | 3.500      | 3.440(0.366)(0.467)(0.996)                           |
| $\beta_1$         | 0.200      | 0.199(0.107)(0.111)(0.960)                           |
| $\sigma_{GX}$     | 2.000      | 1.892(0.108)(0.231)(0.670)                           |
| $\sigma_\epsilon$ | 1.414      | 1.4(0.045)(0.171)(0.284)                             |
| $\alpha_0$        | -2.326     | -1.453(0.472)(0.940)(0.446)                          |
| $\alpha_1$        | 0.500      | 0.295(0.190)(0.222)(0.948)                           |
| $\sigma_{GY}$     | 1.732      | 1.049(0.190)(0.711)(0.074)                           |
| $\sigma_u$        | 1.414      | 1.000(0.572)(0.494)(0.680)                           |

Table S15: Simulations results obtained on 500 datasets with 400 families of size 5 with at least 2 cases of a common disease (prevalence around 5%) and  $\alpha_1=0.1$ . Into brackets are respectively standard deviations, root mean square errors and the coverage probabilities.

|                   | Real Value | Retrospective likelihood<br>Est (SD) (RMSE) (Cov Pr) |
|-------------------|------------|------------------------------------------------------|
| $\beta_0$         | 3.500      | 3.500(0.822)(0.871)(0.961)                           |
| $\beta_1$         | 0.200      | 0.193(0.105)(0.105)(0.951)                           |
| $\sigma_{GX}$     | 2.000      | 1.884(0.140)(0.278)(0.597)                           |
| $\sigma_\epsilon$ | 1.414      | 1.572(0.047)(0.175)(0.236)                           |
| $\alpha_0$        | -1.644     | -1.021(0.804)(1.050)(0.813)                          |
| $\alpha_1$        | 0.100      | 0.051(0.098)(0.230)(1.000)                           |
| $\sigma_{GY}$     | 1.732      | 1.040(0.230)(0.736)(0.131)                           |
| $\sigma_u$        | 1.414      | 0.987(0.517)(0.602)(0.931)                           |

Table S16: Simulations results obtained on 500 datasets with 400 families of size 5 with at least 2 cases of a common disease (prevalence around 5%) and  $\alpha_1=0.5$ . Into brackets are respectively standard deviations, root mean square errors and the coverage probabilities.

|                   | Real Value | Retrospective likelihood<br>Est (SD) (RMSE) (Cov Pr) |
|-------------------|------------|------------------------------------------------------|
| $\beta_0$         | 3.500      | 3.501(0.589)(0.449)(0.996)                           |
| $\beta_1$         | 0.200      | 0.186(0.107)(0.108)(0.940)                           |
| $\sigma_{GX}$     | 2.000      | 1.886(0.125)(0.246)(0.606)                           |
| $\sigma_\epsilon$ | 1.414      | 1.568(0.044)(0.168)(0.174)                           |
| $\alpha_0$        | -1.644     | -0.995(0.508)(0.767)(0.650)                          |
| $\alpha_1$        | 0.500      | 0.289(0.207)(0.232)(0.904)                           |
| $\sigma_{GY}$     | 1.732      | 1.054(0.207)(0.709)(0.088)                           |
| $\sigma_u$        | 1.414      | 1.015(0.480)(0.517)(0.910)                           |

Table S17: Simulations results obtained on 500 datasets with 400 families of size 5 with at least 1 case of a common disease (prevalence around 5%) and  $\alpha_1=0.1$ . Into brackets are respectively standard deviations, root mean square errors and the coverage probabilities.

|                   | Real Value | Retrospective likelihood |         |                 |
|-------------------|------------|--------------------------|---------|-----------------|
|                   |            | Est                      | (SD)    | (RMSE) (Cov Pr) |
| $\beta_0$         | 3.500      | 3.509                    | (0.716) | (0.720)(0.921)  |
| $\beta_1$         | 0.200      | 0.197                    | (0.106) | (0.108)(0.949)  |
| $\sigma_{GX}$     | 2.000      | 1.884                    | (0.117) | (0.254)(0.587)  |
| $\sigma_\epsilon$ | 1.414      | 1.576                    | (0.046) | (0.178)(0.297)  |
| $\alpha_0$        | -1.644     | -1.069                   | (0.730) | (1.078)(0.823)  |
| $\alpha_1$        | 0.100      | 0.055                    | (0.094) | (0.204)(0.905)  |
| $\sigma_{GY}$     | 1.732      | 1.036                    | (0.204) | (0.741)(0.109)  |
| $\sigma_u$        | 1.414      | 0.988                    | (0.499) | (0.512)(0.724)  |

Table S18: Simulations results obtained on 500 datasets with 400 families of size 5 with at least 1 case of a common disease (prevalence around 5%) and  $\alpha_1=0.5$ . Into brackets are respectively standard deviations, root mean square errors and the coverage probabilities.

|                   | Real Value | Retrospective likelihood |         |                 |
|-------------------|------------|--------------------------|---------|-----------------|
|                   |            | Est                      | (SD)    | (RMSE) (Cov Pr) |
| $\beta_0$         | 3.500      | 3.254                    | (0.421) | (0.449)(0.982)  |
| $\beta_1$         | 0.200      | 0.196                    | (0.107) | (0.108)(0.942)  |
| $\sigma_{GX}$     | 2.000      | 1.868                    | (0.099) | (0.226)(0.652)  |
| $\sigma_\epsilon$ | 1.414      | 1.575                    | (0.043) | (0.175)(0.260)  |
| $\alpha_0$        | -1.644     | -1.249                   | (0.440) | (0.540)(0.936)  |
| $\alpha_1$        | 0.500      | 0.302                    | (0.181) | (0.217)(0.948)  |
| $\sigma_{GY}$     | 1.732      | 1.044                    | (0.181) | (0.711)(0.046)  |
| $\sigma_u$        | 1.414      | 1.022                    | (0.383) | (0.450)(0.770)  |

Table S19: Estimates with standard deviations and RMSE of the heritability of the secondary phenotype are given for a common disease (prevalence  $\approx 5\%$ ), for the four ascertainment mechanisms and two values of  $\alpha_1$ .

| Ascertainment       | $\alpha_1$ | Retrospective likelihood | Naive method     |
|---------------------|------------|--------------------------|------------------|
| 1. At least 2 cases |            |                          |                  |
|                     | 0.100      | 0.499(0.102)(0.102)      | 0.17(0.08)(0.34) |
|                     | 0.500      | 0.498(0.089)(0.089)      | 0.19(0.08)(0.32) |
| 2. At least 1 case  |            |                          |                  |
|                     | 0.100      | 0.499(0.089)(0.089)      | 0.29(0.08)(0.22) |
|                     | 0.500      | 0.492(0.076)(0.077)      | 0.31(0.08)(0.20) |

Table S20: Estimates with standard deviations and RMSE of the heritability of the secondary phenotype are given for a rare disease (prevalence  $\approx 1\%$ ), for the four ascertainment mechanisms and two values of  $\alpha_1$ .

| Ascertainment       | $\alpha_1$ | Retrospective likelihood |
|---------------------|------------|--------------------------|
| 1. At least 2 cases |            |                          |
|                     | 0.100      | 0.499(0.107)(0.107)      |
|                     | 0.500      | 0.505(0.104)(0.104)      |
| 2. At least 1 case  |            |                          |
|                     | 0.100      | 0.499(0.092)(0.092)      |
|                     | 0.500      | 0.501(0.084)(0.084)      |

### A.3 Simulation study for a polygenic score

Table S21: Simulations results obtained on 500 datasets with 400 families of size 5 with at least 2 cases of a rare disease (prevalence around 1%) and  $\alpha_1=0.1$ . Into brackets are respectively standard deviations, root mean square errors and the coverage probabilities.

|                   | Real Value | Retrospective likelihood |         |          | Naive method |            |          |
|-------------------|------------|--------------------------|---------|----------|--------------|------------|----------|
|                   |            | Est (SD)                 | (RMSE)  | (Cov Pr) | Est (SD)     | (RMSE)     | (Cov Pr) |
| $\beta_0$         | 3.500      | 3.483(0.899)             | (0.907) | (0.899)  | 5.221(0.067) | (1.723)    | (0.000)  |
| $\beta_1$         | 0.200      | 0.193(0.065)             | (0.073) | (0.932)  | 0.175(0.062) | (0.070)    | (0.922)  |
| $\sigma_{GX}$     | 2.000      | 2.013(0.190)             | (0.357) | (0.657)  | 0.990(0.146) | (1.018131) | (0.000)  |
| $\sigma_\epsilon$ | 1.414      | 1.529(0.055)             | (0.140) | (0.559)  | 2.467(0.025) | (1.054)    | (0.000)  |
| $\alpha_0$        | -2.326     | -1.932(0.921)            | (1.013) | (0.839)  | -            |            |          |
| $\alpha_1$        | 0.100      | 0.076(0.054)             | (0.069) | (0.814)  | -            |            |          |
| $\sigma_{GY}$     | 1.732      | 1.398(0.328)             | (0.548) | (0.793)  | -            |            |          |
| $\sigma_u$        | 1.414      | 1.170(0.778)             | (0.869) | (0.920)  | -            |            |          |

Table S22: Simulations results obtained on 500 datasets with 400 families of size 5 with at least 2 cases of a rare disease (prevalence around 1%) and  $\alpha_1=0.5$ . Into brackets are respectively standard deviations, root mean square errors and the coverage probabilities.

|                   | Real Value | Retrospective likelihood |          |          | Naive method |         |          |
|-------------------|------------|--------------------------|----------|----------|--------------|---------|----------|
|                   |            | Est (SD)                 | (RMSE)   | (Cov Pr) | Est (SD)     | (RMSE)  | (Cov Pr) |
| $\beta_0$         | 3.500      | 3.962(0.541)             | (0.618)  | (0.834)  | 5.178(0.069) | (1.679) | (0.000)  |
| $\beta_1$         | 0.200      | 0.193(0.074)             | (0.079)  | (0.940)  | 0.096(0.063) | (0.122) | (0.610)  |
| $\sigma_{GX}$     | 2.000      | 2.084(0.165)             | (0.346)  | (0.664)  | 1.037(0.135) | (0.972) | (0.000)  |
| $\sigma_\epsilon$ | 1.414      | 1.518(0.053)             | (0.130)  | (0.592)  | 2.452(0.025) | (1.039) | (0.000)  |
| $\alpha_0$        | -2.326     | -1.871(0.522)            | (1.0314) | (0.758)  | -            |         |          |
| $\alpha_1$        | 0.500      | 0.391(0.074)             | (0.134)  | (0.772)  | -            |         |          |
| $\sigma_{GY}$     | 1.732      | 1.471(0.273)             | (0.475)  | (0.796)  | -            |         |          |
| $\sigma_u$        | 1.414      | 1.176(0.670)             | (0.744)  | (0.924)  | -            |         |          |

Table S23: Simulations results obtained on 500 datasets with 400 families of size 5 with at least 1 case of a rare disease (prevalence around 1%) and  $\alpha_1=0.1$ . Into brackets are respectively standard deviations, root mean square errors and the coverage probabilities.

|                   | Real Value | Retrospective likelihood |         |         | Naive method |       |         |         |          |
|-------------------|------------|--------------------------|---------|---------|--------------|-------|---------|---------|----------|
|                   |            | Est                      | (SD)    | (RMSE)  | (Cov Pr)     | Est   | (SD)    | (RMSE)  | (Cov Pr) |
| $\beta_0$         | 3.500      | 3.338                    | (0.573) | (0.655) | (0.862)      | 4.370 | (0.076) | (0.850) | (0.000)  |
| $\beta_1$         | 0.200      | 0.190                    | (0.067) | (0.067) | (0.954)      | 0.189 | (0.066) | (0.066) | (0.948)  |
| $\sigma_{GX}$     | 2.000      | 1.925                    | (0.163) | (0.364) | (0.645)      | 1.386 | (0.088) | (0.626) | (0.000)  |
| $\sigma_\epsilon$ | 1.414      | 1.460                    | (0.057) | (0.171) | (0.676)      | 2.364 | (0.028) | (0.952) | (0.000)  |
| $\alpha_0$        | -2.326     | -2.219                   | (0.774) | (0.922) | (0.889)      | -     |         |         |          |
| $\alpha_1$        | 0.100      | 0.073                    | (0.058) | (0.071) | (0.829)      | -     |         |         |          |
| $\sigma_{GY}$     | 1.732      | 1.359                    | (0.307) | (0.583) | (0.611)      | -     |         |         |          |
| $\sigma_u$        | 1.414      | 1.186                    | (0.623) | (0.714) | (0.926)      | -     |         |         |          |

Table S24: Simulations results obtained on 500 datasets with 400 families of size 5 with at least 1 case of a rare disease (prevalence around 1%) and  $\alpha_1=0.5$ . Into brackets are respectively standard deviations, root mean square errors and the coverage probabilities.

|                   | Real Value | Retrospective likelihood |         |         | Naive method |       |         |         |          |
|-------------------|------------|--------------------------|---------|---------|--------------|-------|---------|---------|----------|
|                   |            | Est                      | (SD)    | (RMSE)  | (Cov Pr)     | Est   | (SD)    | (RMSE)  | (Cov Pr) |
| $\beta_0$         | 3.500      | 3.542                    | (0.361) | (0.411) | (0.963)      | 4.346 | (0.076) | (0.850) | (0.000)  |
| $\beta_1$         | 0.200      | 0.197                    | (0.074) | (0.078) | (0.944)      | 0.157 | (0.066) | (0.079) | (0.904)  |
| $\sigma_{GX}$     | 2.000      | 2.018                    | (0.127) | (0.278) | (0.663)      | 1.412 | (0.186) | (0.600) | (0.000)  |
| $\sigma_\epsilon$ | 1.414      | 1.538                    | (0.052) | (0.147) | (0.582)      | 2.352 | (0.029) | (0.940) | (0.000)  |
| $\alpha_0$        | -2.326     | -1.876                   | (0.425) | (0.631) | (0.797)      | -     |         |         |          |
| $\alpha_1$        | 0.500      | 0.401                    | (0.074) | (0.128) | (0.838)      | -     |         |         |          |
| $\sigma_{GY}$     | 1.732      | 1.435                    | (0.240) | (0.473) | (0.619)      | -     |         |         |          |
| $\sigma_u$        | 1.414      | 1.209                    | (0.466) | (0.574) | (0.948)      | -     |         |         |          |

Table S25: Simulations results obtained on 500 datasets with 400 families of size 5 with at least 2 cases of a common disease (prevalence around 5%) and  $\alpha_1=0.1$ . Into brackets are respectively standard deviations, root mean square errors and the coverage probabilities.

|                   | Real Value | Retrospective likelihood |         |          | Naive method |         |          |
|-------------------|------------|--------------------------|---------|----------|--------------|---------|----------|
|                   |            | Est (SD)                 | (RMSE)  | (Cov Pr) | Est (SD)     | (RMSE)  | (Cov Pr) |
| $\beta_0$         | 3.500      | 3.370(0.854)             | (0.854) | (0.933)  | 4.854(0.069) | (1.356) | (0.000)  |
| $\beta_1$         | 0.200      | 0.192(0.067)             | (0.067) | (0.952)  | 0.177(0.063) | (0.063) | (0.948)  |
| $\sigma_{GX}$     | 2.000      | 2.018(0.127)             | (0.278) | (0.663)  | 1.113(0.118) | (0.896) | (0.000)  |
| $\sigma_\epsilon$ | 1.414      | 1.538(0.052)             | (0.147) | (0.682)  | 2.405(0.026) | (0.992) | (0.000)  |
| $\alpha_0$        | -1.644     | -1.470(0.875)            | (0.897) | (0.897)  | -            |         |          |
| $\alpha_1$        | 0.100      | 0.073(0.057)             | (0.068) | (0.879)  | -            |         |          |
| $\sigma_{GY}$     | 1.732      | 1.477(0.295)             | (0.500) | (0.772)  | -            |         |          |
| $\sigma_u$        | 1.414      | 1.099(0.997)             | (1.139) | (0.945)  | -            |         |          |

Table S26: Simulations results obtained on 500 datasets with 400 families of size 5 with at least 2 cases of a common disease (prevalence around 5%) and  $\alpha_1=0.5$ . Into brackets are respectively standard deviations, root mean square errors and the coverage probabilities.

|                   | Real Value | Retrospective likelihood |         |          | Naive method |         |          |
|-------------------|------------|--------------------------|---------|----------|--------------|---------|----------|
|                   |            | Est (SD)                 | (RMSE)  | (Cov Pr) | Est (SD)     | (RMSE)  | (Cov Pr) |
| $\beta_0$         | 3.500      | 3.653(0.502)             | (0.593) | (0.932)  | 4.823(0.070) | (1.325) | (0.000)  |
| $\beta_1$         | 0.200      | 0.192(0.073)             | (0.075) | (0.954)  | 0.103(0.064) | (0.115) | (0.656)  |
| $\sigma_{GX}$     | 2.000      | 2.055(0.149)             | (0.309) | (0.664)  | 1.148(0.113) | (0.861) | (0.000)  |
| $\sigma_\epsilon$ | 1.414      | 1.530(0.051)             | (0.140) | (0.614)  | 2.395(0.026) | (0.982) | (0.000)  |
| $\alpha_0$        | -1.644     | -1.367(0.495)            | (0.599) | (0.848)  | -            |         |          |
| $\alpha_1$        | 0.500      | 0.394(0.072)             | (0.131) | (0.868)  | -            |         |          |
| $\sigma_{GY}$     | 1.732      | 1.462(0.255)             | (0.456) | (0.762)  | -            |         |          |
| $\sigma_u$        | 1.414      | 1.172(0.645)             | (0.733) | (0.954)  | -            |         |          |

Table S27: Simulations results obtained on 500 datasets with 400 families of size 5 with at least 1 case of a common disease (prevalence around 5%) and  $\alpha_1=0.1$ . Into brackets are respectively standard deviations, root mean square errors and the coverage probabilities.

|                   | Real Value | Retrospective likelihood |           |          | Naive method |         |          |
|-------------------|------------|--------------------------|-----------|----------|--------------|---------|----------|
|                   |            | Est (SD)                 | (RMSE)    | (Cov Pr) | Est (SD)     | (RMSE)  | (Cov Pr) |
| $\beta_0$         | 3.500      | 3.088(0.524)             | (0.701)   | (0.896)  | 4.134(0.077) | (0.639) | (0.000)  |
| $\beta_1$         | 0.200      | 0.196(0.066)             | (0.0.066) | (0.960)  | 0.193(0.066) | (0.071) | (0.962)  |
| $\sigma_{GX}$     | 2.000      | 1.936(0.144)             | (0.364)   | (0.694)  | 1.482(0.080) | (0.531) | (0.000)  |
| $\sigma_\epsilon$ | 1.414      | 1.568(0.052)             | (0.218)   | (0.607)  | 2.296(0.030) | (0.884) | (0.000)  |
| $\alpha_0$        | -1.644     | -1.955(0.669)            | (0.941)   | (0.953)  | -            |         |          |
| $\alpha_1$        | 0.100      | 0.077(0.056)             | (0.065)   | (0.847)  | -            |         |          |
| $\sigma_{GY}$     | 1.732      | 1.444(0.285)             | (0.410)   | (0.687)  | -            |         |          |
| $\sigma_u$        | 1.414      | 1.244(0.321)             | (0.415)   | (0.937)  | -            |         |          |

Table S28: Simulations results obtained on 500 datasets with 400 families of size 5 with at least 1 case of a common disease (prevalence around 5%) and  $\alpha_1=0.5$ . Into brackets are respectively standard deviations, root mean square errors and the coverage probabilities.

|                   | Real Value | Retrospective likelihood |         |          | Naive method |         |          |
|-------------------|------------|--------------------------|---------|----------|--------------|---------|----------|
|                   |            | Est (SD)                 | (RMSE)  | (Cov Pr) | Est (SD)     | (RMSE)  | (Cov Pr) |
| $\beta_0$         | 3.500      | 3.278(0.341)             | (0.408) | (0.958)  | 4.118(0.077) | (0.623) | (0.000)  |
| $\beta_1$         | 0.200      | 0.187(0.072)             | (0.078) | (0.953)  | 0.159(0.067) | (0.074) | (0.928)  |
| $\sigma_{GX}$     | 2.000      | 1.952(0.118)             | (0.285) | (0.610)  | 1.508(0.078) | (0.506) | (0.004)  |
| $\sigma_\epsilon$ | 1.414      | 1.552(0.049)             | (0.161) | (0.607)  | 2.286(0.030) | (0.874) | (0.000)  |
| $\alpha_0$        | -1.644     | -1.648(0.395)            | (0.567) | (0.988)  | -            |         |          |
| $\alpha_1$        | 0.500      | 0.392(0.071)             | (0.140) | (0.798)  | -            |         |          |
| $\sigma_{GY}$     | 1.732      | 1.373(0.230)             | (0.504) | (0.660)  | -            |         |          |
| $\sigma_u$        | 1.414      | 1.223(0.328)             | (0.337) | (0.943)  | -            |         |          |

Table S29: Estimates with standard deviations and RMSE of the heritability of the secondary phenotype are given for a rare disease (prevalence  $\approx 1\%$ ), for the four ascertainment mechanisms and two values of  $\alpha_1$ .

| Ascertainment       | $\alpha_1$ | Retrospective likelihood | Naive method     |
|---------------------|------------|--------------------------|------------------|
| 1. At least 2 cases |            |                          |                  |
|                     | 0.10       | 0.50(0.03)(0.13)         | 0.14(0.03)(0.36) |
|                     | 0.50       | 0.52(0.03)(0.12)         | 0.15(0.03)(0.34) |
| 2. At least 1 case  |            |                          |                  |
|                     | 0.10       | 0.48(0.04)(0.12)         | 0.25(0.03)(0.24) |
|                     | 0.50       | 0.50(0.04)(0.10)         | 0.26(0.04)(0.23) |



## B Results analysis Leiden Longevity Study on triglyceride levels

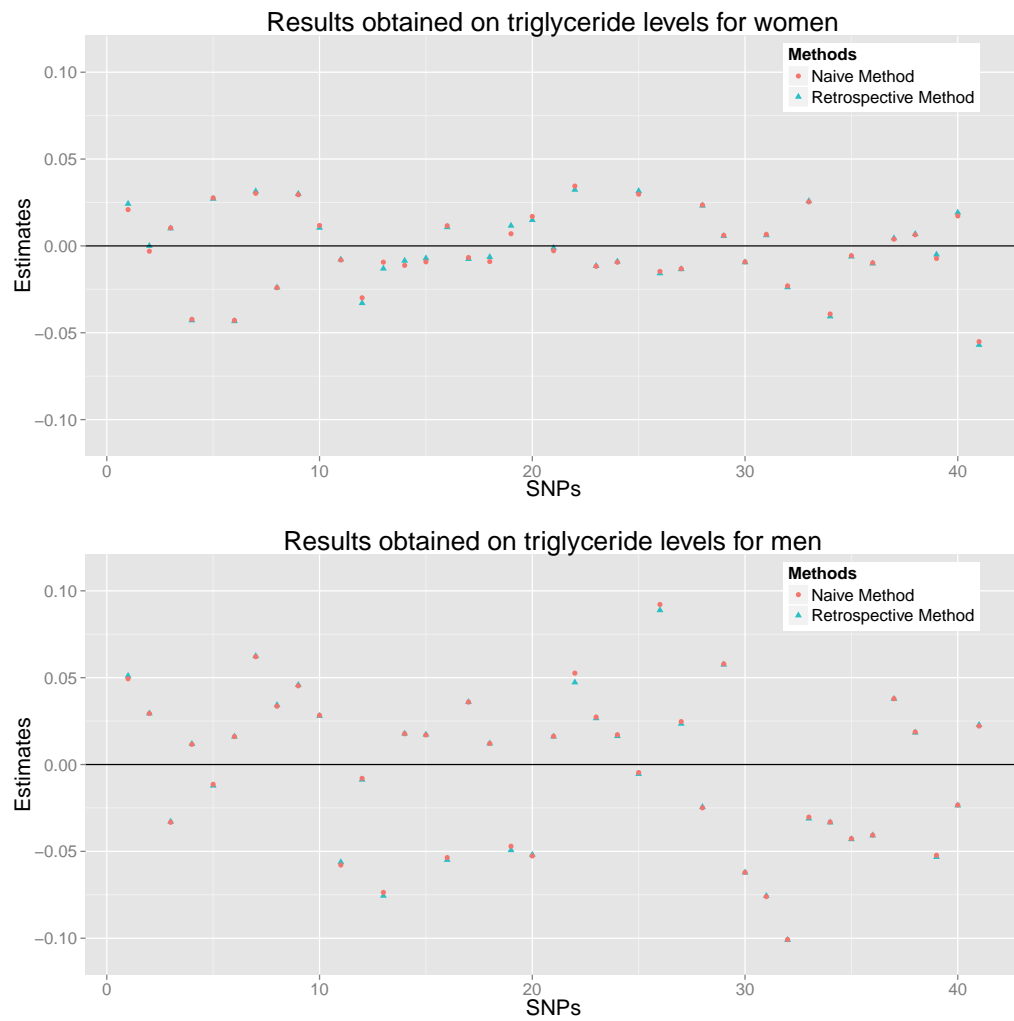

Figure S2: Estimates for the association of 41 SNPs with triglyceride in the LLS. In the top and bottom are the estimates of the 41 SNPs for women and for men respectively. The black line represents no SNP effect on triglyceride.

Table S30: Leiden Longevity Study: Estimates of the association between the 41 selected SNPs and triglyceride levels for women and for three different approaches. The retrospective likelihood approach with same variance assumed for the shared random effect, with different variances, and the naive approach. Are also presented the absolute difference between the estimates of the two last approaches with the first one. Into brackets are the standard errors.

| SNPs         | Constrained approach | Not Constrained approach |            | Naive Likelihood |            |
|--------------|----------------------|--------------------------|------------|------------------|------------|
|              | Estimates (SE)       | Estimates (SE)           | Difference | Estimates (SE)   | Difference |
| rs3863318_A  | .0242(.0205)         | .0245(.0205)             | .0003      | .0209(.0205)     | .0033      |
| rs2512139_A  | .0000(.0215)         | .0000(.0345)             | .0000      | -.0031(.0214)    | .0031      |
| rs7103514_G  | .0101(.0365)         | .0101(.0275)             | .0000      | .0104(.0367)     | .0003      |
| rs2512158_A  | -.0428(.0206)        | -.0430(.0208)            | .0002      | -.0423(.0207)    | .0005      |
| rs11216648_G | .0271(.0206)         | .0272(.0206)             | .0001      | .0276(.0207)     | .0005      |
| rs4936414_G  | -.0433(.0212)        | -.430 (.0212)            | .0003      | -.0429(.0213)    | .0004      |
| rs4252287_A  | .0314(.0345)         | .0313(.0385)             | .0001      | .0303(.0347)     | .0011      |
| rs947889_G   | -.0239(.0202)        | -.0238(.0199)            | .0001      | -.0241(.0203)    | .0002      |
| rs2512154_A  | .0299(.0307)         | .0298(.0215)             | .0001      | .0295(.0308)     | .0004      |
| rs4936417_G  | .0104(.0223)         | .0104(.0233)             | .0000      | .0118(.0223)     | .0014      |
| rs652107_G   | -.0078(.0275)        | -.0075(.206)             | .0003      | -.0081(.0276)    | .0003      |
| rs12576767_A | -.0329(.0432)        | -.320(.0367)             | .0009      | -.0299(.0433)    | .0030      |
| rs1786186_A  | -.0131(.0287)        | -.0132(.0216)            | .0001      | -.0094(.0287)    | .0037      |
| rs3825050_A  | -.0085(.0219)        | -.0083(.0205)            | .0002      | -.0112(.0219)    | .0027      |
| rs10160375_G | -.0071(.0214)        | -.0072(.0203)            | .0001      | -.0092(.0215)    | .0021      |
| rs689264_A   | .0108(.0368)         | .0107(.0431)             | .0001      | .0116(.0370)     | .0008      |
| rs948461_A   | -.0075(.0216)        | -.0072(.205)             | .0003      | -.0067(.0217)    | .0008      |
| rs2276123_A  | -.0064(.0218)        | .0070(.0243)             | .0006      | -.0090(.0218)    | .0026      |
| rs948466_A   | .0116(.0385)         | .0069(.0509)             | .0047      | .0070(.0387)     | .0046      |
| rs881122_A   | .0149(.0243)         | .0149(.0217)             | .0000      | .0169(.0244)     | .0020      |
| rs2276129_A  | -.0012(.0217)        | -.0008(.0217)            | .0004      | -.0028(.0218)    | .0016      |
| rs2155857_A  | .0323(.0509)         | .0320(.0200)             | .0003      | .0344(.0511)     | .0021      |
| rs1894177_A  | -.0115(.0200)        | -.0130(.0456)            | .0015      | -.0118(.0201)    | .0003      |
| rs596134_G   | -.0090(.0202)        | -.0094(.205)             | .0004      | -.0094(.0203)    | .0004      |
| rs3741311_G  | .0316(.0215)         | .0311(.0364)             | .0005      | .0298(.0216)     | .0018      |
| rs1941637_A  | -.0158(.054)         | -.0159(.0214)            | .0001      | -.0147(.0542)    | .0011      |
| rs658624_G   | -.0134(.0205)        | -.136(.0203)             | .0002      | -.0131(.0206)    | .0003      |
| rs625464_A   | .0232(.0200)         | .0234(.286)              | .0002      | .0236(.0200)     | .0004      |
| rs11216788_A | .0057(.0204)         | .0057(.219)              | .0000      | .0061(.0204)     | .0004      |
| rs679327_G   | -.0094(.0217)        | -.0092(.251)             | .0002      | -.0092(.0218)    | .0002      |
| rs678957_A   | .0061(.0457)         | .0053(.0209)             | .0008      | .0066(.0459)     | .0005      |
| rs7944321_A  | -.0238(.0252)        | -.0238(.0327)            | .0000      | -.0230(.0253)    | .0008      |
| rs7949751_G  | .0258(.0233)         | .0257(.0267)             | .0001      | .0254(.0234)     | .0004      |
| rs11216816_A | -.0406(.0268)        | -.0399(.0201)            | .0007      | -.0392(.0268)    | .0014      |
| rs1805_A     | -.0061(.0200)        | -.0060(.0201)            | .0001      | -.0056(.0201)    | .0005      |
| rs3759001_A  | -.0101(.0205)        | -.103(.214)              | .0002      | -.0098(.0206)    | .0003      |
| rs4938493_C  | .0044(.0203)         | .0044(.217)              | .0000      | .0039(.0204)     | .0005      |
| rs2853009_A  | .0068(.0201)         | .0068(.0222)             | .0000      | .0064(.0202)     | .0004      |
| rs12282721_A | -.0050(.0327)        | -.0052(.0199)            | .0002      | -.0072(.0328)    | .0022      |
| rs676134_A   | .0192(.0210)         | .0185(.0200)             | .0007      | .0173(.0210)     | .0019      |
| rs7083_A     | -.0570(.0205)        | -.0572(.0205)            | .0002      | -.0551(.0206)    | .0019      |

Table S31: Leiden Longevity Study: Estimates of the association between the 41 selected SNPS and triglyceride levels for men and for three different approaches. The retrospective likelihood approach with same variance assumed for the shared random effect, with different variances, and the naive approach. Are also presented the absolute difference between the estimates of the two last approaches with the first one. Into brackets are the standard errors.

| SNPs         | Constrained approach | Not Constrained approach |            | Naive Likelihood |            |
|--------------|----------------------|--------------------------|------------|------------------|------------|
|              | Estimates (SE)       | Estimates (SE)           | Difference | Estimates (SE)   | Difference |
| rs3863318_A  | .0511(.0236)         | .0501(.0236)             | .0010      | .0494(.0236)     | .0017      |
| rs2512139_A  | .0294(.0249)         | .0285(.0249)             | .0009      | .0294(.0249)     | .0000      |
| rs7103514_G  | -.0329(.0426)        | -.0324(.0427)            | .0005      | -.0332(.0426)    | .0003      |
| rs2512158_A  | .0119(.0241)         | .0118(.0241)             | .0001      | .0116(.0241)     | .0003      |
| rs11216648_G | -.0121(.0244)        | -.0124(.0244)            | .0003      | -.0114(.0244)    | .0007      |
| rs4936414_G  | .0161(.0244)         | .0162(.0245)             | .0001      | .0161(.0244)     | .0000      |
| rs4252287_A  | .0624(.0386)         | .0631(.0386)             | .0007      | .0620(.0386)     | .0004      |
| rs947889_G   | .0343(.0237)         | .0335(.0238)             | .0008      | .0335(.0237)     | .0008      |
| rs2512154_A  | .0458(.0351)         | .0444(.0353)             | .0014      | .0453(.0352)     | .0009      |
| rs4936417_G  | .0280(.0256)         | .0280(.0256)             | .0000      | .0283(.0256)     | .0003      |
| rs652107_G   | -.0562(.0310)        | -.0568(.0311)            | .0006      | -.0579(.0310)    | .0017      |
| rs12576767_A | -.0087(.0468)        | -.0086(.0472)            | .0001      | -.0080(.0469)    | .0007      |
| rs1786186_A  | -.0755(.0356)        | -.0748(.0357)            | .0007      | -.0736(.0357)    | .0019      |
| rs3825050_A  | .0178(.0250)         | .0182(.0252)             | .0004      | .0177(.0251)     | .0001      |
| rs10160375_G | .0172(.0248)         | .0172(.0249)             | .0000      | .0170(.0248)     | .0002      |
| rs689264_A   | -.0549(.0466)        | -.0549(.0465)            | .0000      | -.0536(.0466)    | .0013      |
| rs948461_A   | .0360(.0249)         | .0352(.025)              | .0008      | .0360(.0249)     | .0000      |
| rs2276123_A  | .0121(.0253)         | .0121(.0253)             | .0000      | .0121(.0253)     | .0000      |
| rs948466_A   | -.0493(.0498)        | -.0491(.0499)            | .0002      | -.0470(.0499)    | .0023      |
| rs881122_A   | -.0519(.0280)        | -.0523(.028)             | .0004      | -.0526(.0280)    | .0007      |
| rs2276129_A  | .0161(.0250)         | .0161(.0251)             | .0000      | .0162(.0250)     | .0001      |
| rs2155857_A  | .0473(.0633)         | .0482(.0634)             | .0009      | .0526(.0633)     | .0053      |
| rs1894177_A  | .0267(.0232)         | .0263(.0233)             | .0004      | .0273(.0232)     | .0006      |
| rs596134_G   | .0164(.0238)         | .0160(.0238)             | .0004      | .0172(.0238)     | .0008      |
| rs3741311_G  | -.0054(.0247)        | -.0052(.0248)            | .0002      | -.0046(.0247)    | .0008      |
| rs1941637_A  | .0888(.0667)         | .0897(.0668)             | .0011      | .0921(.0667)     | .0033      |
| rs658624_G   | .0235(.0239)         | .0232(.0239)             | .0003      | .0247(.0239)     | .0012      |
| rs625464_A   | -.0245(.0239)        | -.0241(.024)             | .0004      | -.0249(.0240)    | .0004      |
| rs11216788_A | .0575(.0239)         | .0572(.024)              | .0003      | .0579(.0240)     | .0004      |
| rs679327_G   | -.0622(.0270)        | -.0623(.0271)            | .0001      | -.0621(.0270)    | .0001      |
| rs678957_A   | -.0756(.0583)        | -.0768(.0585)            | .0012      | -.0761(.0583)    | .0005      |
| rs7944321_A  | -.1010(.0315)        | -.1012(.0315)            | .0002      | -.1008(.0315)    | .0002      |
| rs7949751_G  | -.0311(.0270)        | -.0310(.027)             | .0001      | -.0303(.0270)    | .0008      |
| rs11216816_A | -.0334(.0330)        | -.0333(.033)             | .0001      | -.0331(.0330)    | .0003      |
| rs1805_A     | -.0430(.0243)        | -.0428(.0243)            | .0002      | -.0427(.0243)    | .0003      |
| rs3759001_A  | -.0408(.0241)        | -.0406(.0242)            | .0002      | -.0407(.0241)    | .0001      |
| rs4938493_C  | .0377(.0236)         | .0377(.0237)             | .0000      | .0379(.0236)     | .0002      |
| rs2853009_A  | .0184(.0234)         | .0184(.0234)             | .0000      | .0187(.0234)     | .0003      |
| rs12282721_A | -.0532(.0379)        | -.0534(.038)             | .0002      | -.0523(.0379)    | .0009      |
| rs676134_A   | -.0236(.0243)        | -.0234(.0244)            | .0002      | -.0233(.0243)    | .0003      |
| rs7083_A     | .0228(.0244)         | .0229(.0245)             | .0001      | .0221(.0244)     | .0007      |
